# Supplementary material
Source: Elsevier journal article supplement (https://www.sciencedirect.com/science/article/pii/S0264410X22010283)
Supplement: mmc1 [file 1-s2.0-S0264410X22010283-mmc1.docx]

| **Supplemental Table 1. Included and excluded SAE types across both trials** |
| --- |
| **Included SAE types (matching AESI list):** Abdominal pain, Abdominal pain upper, Abscess, Abscess intestinal, Acute coronary syndrome, Acute kidney injury, Acute left ventricular failure, Acute myocardial infarction, Acute respiratory failure, Anaemia, Anaphylactic reaction, Anaphylactic shock, Angina pectoris, Angina unstable, Angioedema, Aortic aneurysm, Aortic valve incompetence, Arrhythmia supraventricular, Arteriospasm coronary, Arthritis, Atrial fibrillation, Atrial flutter, Axillary vein thrombosis, Basal ganglia haemorrhage, Bile duct stone, Blood loss anaemia, Bradycardia, Brain abscess, Cardiac failure, Cardiac failure acute, Cardiac failure congestive, Cardiac stress test abnormal, Cardio-respiratory arrest, Cerebral infarction, Cerebrovascular accident, Chest pain, Cholecystitis, Cholecystitis acute, Cholelithiasis, Colitis, Coronary artery disease, Coronary artery dissection, Coronary artery occlusion, Coronary artery thrombosis, Deep vein thrombosis, Dermatitis bullous, Diabetic ketoacidosis, Diarrhoea, Diplegia, Dyspnoea, Embolic stroke, Empyema, Facial paralysis, Fluid retention, Gastroenteritis, Gastrointestinal haemorrhage, Haematoma, Haemorrhagic stroke, Hemiplegic migraine, Hepatic enzyme increased, Hyperglycaemia, Hyponatraemia, Hypoxia, Ischaemic stroke, Laryngeal oedema, Multiple sclerosis, Myocardial infarction, Non-cardiac chest pain, Oedema peripheral, Pancreatitis, Pancreatitis acute, Pericarditis, Peripheral artery aneurysm, Peritoneal abscess, Pleuritic pain, Pneumothorax, Post procedural haematoma, Post procedural haemorrhage, Postoperative abscess, Procedural haemorrhage, Psychotic disorder, Pulmonary embolism, Rash, Rash vesicular, Respiratory failure, Retinal artery occlusion, Rhabdomyolysis, Rheumatoid arthritis, Schizoaffective disorder, Seizure, Subarachnoid haemorrhage, Subcapsular renal haematoma, Subdural haematoma, Tachyarrhythmia, Tachycardia, Thrombocytopenia, Thyroid disorder, Toxic encephalopathy, Transaminases increased, Transient ischaemic attack, Traumatic intracranial haemorrhage, Type 2 diabetes mellitus, Uraemic encephalopathy, Uterine haemorrhage, Vascular stent occlusion, Ventricular arrhythmia  **Excluded SAE types (not matching AESI list):** Abdominal adhesions, Abortion spontaneous, Abortion spontaneous incomplete, Accelerated hypertension, Adenocarcinoma gastric, Adrenal gland cancer, Alcohol abuse, Alcohol poisoning, Alcohol withdrawal syndrome, Animal bite, Ankle arthroplasty, Ankle fracture, Anxiety, Anxiety disorder, Aortic stenosis, Appendicitis, Appendicitis perforated, Arteriosclerosis, Asthma, Atelectasis, Autonomic nervous system imbalance, B-cell small lymphocytic lymphoma, Back injury, Back pain, Benign prostatic hyperplasia, Bipolar disorder, Breast cancer, Breast cancer stage I, Breast hyperplasia, Bronchitis, Cartilage injury, Cellulitis, Cervical radiculopathy, Cervical spinal stenosis, Cervical vertebral fracture, Choroidal neovascularisation, Chronic kidney disease, Chronic lymphocytic leukaemia, Chronic myeloid leukaemia, Chronic obstructive pulmonary disease, Clostridium difficile colitis, Clostridium difficile infection, Colon cancer stage III, Colon injury, Colorectal cancer, Completed suicide, Complicated appendicitis, Concussion, Confusional state, Constipation, Cough, Craniocerebral injury, Dehydration, Depression, Diplopia, Diverticular perforation, Diverticulitis, Dizziness, Drug hypersensitivity, Duodenal ulcer, Duodenal ulcer haemorrhage, Emphysema, Facial bones fracture, Fall, Feeling hot, Femoral neck fracture, Femur fracture, Fibromuscular dysplasia, Flail chest, Flank pain, Food poisoning, Foot fracture, Foot operation, Forearm fracture, Fracture nonunion, Gastric cancer, Gastric perforation, Gastrooesophageal reflux disease, Gout, Gun shot wound, Head injury, Heart disease congenital, Hepatic cancer metastatic, Hepatic mass, Hepatitis A, Hernia, Hiatus hernia, Hip arthroplasty, Hip fracture, Humerus fracture, Hypertension, Hypertensive emergency, Hypertensive urgency, Hypoglycaemia, Hypokalaemia, Hypomagnesaemia, Hypotension, Idiopathic intracranial hypertension, Immunisation anxiety related reaction, Incarcerated hernia, Incision site pain, Influenza like illness, Intentional self-injury, Interstitial lung disease, Intervertebral disc degeneration, Intervertebral disc protrusion, Intestinal obstruction, Intestinal perforation, Intraductal proliferative breast lesion, Invasive ductal breast carcinoma, Invasive lobular breast carcinoma, JAMMED RIGHT INGUINAL HERNIA@@, Jaw operation, Joint injury, Knee arthroplasty, Large intestine perforation, Lead dislodgement, Leiomyosarcoma metastatic, Leydig cell tumour of the testis, Ligament rupture, Loss of consciousness, Lower limb fracture, Lung cancer metastatic, Lymphadenopathy, Major depression, Malignant melanoma, Meningioma, Mental disorder, Metabolic acidosis, Metastases to central nervous system, Migraine, Multiple injuries, Musculoskeletal chest pain, Nausea, Neck pain, Nephrolithiasis, Neutropenia, Obstructive pancreatitis, Oesophageal carcinoma, Oesophageal food impaction, Organising pneumonia, Orthostatic hypotension, Osteoarthritis, Osteochondritis, Osteomyelitis, Ovarian cyst, Ovarian mass, Overdose, Pancreatic mass, Papillary thyroid cancer, Paraesthesia, Pelvic neoplasm, Penile cancer, Penile neoplasm, Peritonitis, Pharyngitis streptococcal, Pleural effusion, Pneumonia, Pneumonia aspiration, Pneumonia staphylococcal, Pneumonitis, Polymyalgia rheumatica, Postoperative wound infection, Precancerous condition, Prostate cancer, Prostate cancer metastatic, Pulmonary mass, Pyelonephritis, Pyelonephritis acute, Rectal prolapse, Renal cancer, Renal cell carcinoma, Renal colic, Retinal detachment, Retinal tear, Rib fracture, Road traffic accident, Salivary gland calculus, Salpingitis, Sepsis, Septic shock, Sexual abuse, Shoulder injury related to vaccine administration, Skin laceration, Small intestinal obstruction, Speech disorder, Spinal cord injury cervical, Spinal fusion surgery, Spinal stenosis, Staphylococcal infection, Streptococcal sepsis, Suicidal ideation, Suicide attempt, Suspected COVID-19, Swelling face, Syncope, Systemic inflammatory response syndrome, Tendon rupture, Thoracic vertebral fracture, Thyroidectomy, Toxic shock syndrome, Toxicity to various agents, Transient global amnesia, Traumatic liver injury, Ulna fracture, Umbilical hernia, Unevaluable event, Urinary bladder polyp, Urinary tract infection, Urosepsis, Uterine leiomyoma, Uterine prolapse, Vertigo, Viral pharyngitis, Volvulus, Vomiting, Wound infection, Wrist fracture  **Excluded SAE types (efficacy-related endpoints):** COVID-19, COVID-19 pneumonia, SARS-CoV-2 test positive.  Note: Pfizer and Moderna coded all SAEs using the MedDRA coding dictionary; terms here are reproduced verbatim from the SAE tables. Preferred terms with @@ denote uncoded terms. |

| **Supplemental Table 2. Sensitivity analysis** | | | | |
| --- | --- | --- | --- | --- |
|  | **Eventsa** | | **Risk difference**  **per 10,000 participants (95% CI)d** | **Risk ratio (95% CI)d** |
| **Trial** | **Vaccine** | **Placebo** |
| **Serious adverse events of special interestb** | | | | |
| Pfizer | 52 | 33 | 10.1 (-0.4 to 20.6) | 1.57 (0.98 to 2.54) |
| Moderna | 87 | 64 | 15.1 (-3.6 to 33.8) | 1.36 (0.93 to 1.99) |
| Combinede | 139 | 97 | 12.5 (2.1 to 22.9) | 1.43 (1.07 to 1.92) |
| **SAEs matching Brighton’s SPEAC COVID-19 AESI listc** | | | | |
| Pfizer | 39 | 28 | 5.8 (-3.5 to 15.2) | 1.39 (0.82 to 2.37) |
| Moderna | 65 | 56 | 5.9 (-10.9 to 22.6) | 1.16 (0.76 to 1.77) |
| Combinede | 104 | 84 | 5.9 (-3.2 to 15.0) | 1.24 (0.89 to 1.72) |
| a Denominators for Pfizer were 18,801 in the vaccine group and 18,785 in the placebo group, and for Moderna were 15,185 in the vaccine group and 15,166 in the placebo group.  b This analysis, presented in the main paper, is reproduced here for ease of interpreting the sensitivity analysis.  c This list does not include the 29 clinical diagnoses Brighton identified as “known to have been reported [in conjunction with COVID-19] but not in sufficient numbers to merit inclusion on the AESI list.”  d Standard errors used to estimate 95% CIs were inflated by the factor √[#SAE]/[#patients with SAE] to account for multiple SAE within patients.  e The combined risk differences and risk ratios were computed from the fitted logistic regression models and so may not exactly equal comparisons computed from the first two columns. | | | | |
